# Supplementary material for: Correlation of solute diffusion with dynamic viscosity in lithium salt-added (choline chloride + glycerol) deep eutectic solvents
Source: Royal Society of Chemistry journal article supplement (doi:10.1039/d3cp04664h), 2023-01-01
Supplement: d3cp04664h1.pdf [file d3cp04664h1.pdf]

## **Electronic Supplementary Information (ESI)**

### **Correlation of solute diffusion with dynamic viscosity in lithium salt added (choline chloride + glycerol) deep eutectic solvent**

Manish Kumar and Siddharth Pandey\*

Department of Chemistry, Indian Institute of Technology Delhi, Hauz Khas, New Delhi –  
110016, India.

\*To whom correspondence should be addressed.

E-mail: sipandey@chemistry.iitd.ac.in, Phone: +91-11-26596503, Fax: +91-11-26581102

# Table of Contents

|                | Page No. |
|----------------|----------|
| Table S1.....  | S2       |
| Table S2.....  | S3       |
| Table S3.....  | S4       |
| Table S4.....  | S5       |
| Table S5.....  | S6       |
| Table S6.....  | S7       |
| Table S7.....  | S8       |
| Table S8.....  | S9       |
| Table S9.....  | S17      |
| Table S10..... | S18      |
| Table S11..... | S20      |
| Table S12..... | S21      |
| Table S13..... | S23      |
| Table S14..... | S24      |
| Table S15..... | S26      |
| Table S16..... | S27      |
| Table S17..... | S29      |
| Fig. S1.....   | S30      |

**Table S1:** Linear regression analysis of density ( $\rho/\text{g}\cdot\text{cm}^{-3}$ ) vs  $T$  (K) data for LiCl-added Glyceline, Reline, and 1 wt% water in glycerol, respectively.

| $m_{\text{LiCl}}$<br>(mol.kg <sup>-1</sup> ) | (-) Slope (g.cm <sup>-3</sup> .K <sup>-1</sup> ) × 10 <sup>-4</sup> |                      |                                       |
|----------------------------------------------|---------------------------------------------------------------------|----------------------|---------------------------------------|
|                                              | Glyceline                                                           | Reline <sup>17</sup> | 1 wt% water in glycerol <sup>19</sup> |
| <b>0.00</b>                                  | 6.12 ± 0.23                                                         | 6.22 ± 0.21          | 6.78 ± 0.16                           |
| <b>0.42</b>                                  | -                                                                   | 6.40 ± 0.20          | -                                     |
| <b>0.50</b>                                  | 6.14 ± 0.25                                                         | -                    | 6.74 ± 0.19                           |
| <b>0.83</b>                                  | -                                                                   | 6.21 ± 0.27          | -                                     |
| <b>1.00</b>                                  | 6.16 ± 0.26                                                         | -                    | 6.69 ± 0.22                           |
| <b>1.26</b>                                  | -                                                                   | 6.17 ± 0.29          | -                                     |
| <b>1.50</b>                                  | 6.16 ± 0.27                                                         | -                    | 6.64 ± 0.25                           |
| <b>1.67</b>                                  | -                                                                   | 6.17 ± 0.31          | -                                     |
| <b>2.00</b>                                  | 6.18 ± 0.28                                                         | -                    | 6.60 ± 0.27                           |
| <b>2.10</b>                                  | -                                                                   | 6.10 ± 0.33          | -                                     |
| <b>2.50</b>                                  | 6.19 ± 0.29                                                         | -                    | 6.56 ± 0.30                           |
| <b>3.00</b>                                  | 6.22 ± 0.31                                                         | -                    | 6.53 ± 0.32                           |

**Table S2:** Linear regression analysis of density ( $\rho/\text{g}\cdot\text{cm}^{-3}$ ) vs  $m_{\text{LiCl}}$  ( $\text{mol}\cdot\text{kg}^{-1}$ ) data for LiCl-added Glyceline, Reline, and 1 wt% water in glycerol, respectively.

| $T$ (K) | Slope ( $\text{g}^2\cdot\text{cm}^{-3}\cdot\text{mol}^{-1}$ ) |                      |                                       |
|---------|---------------------------------------------------------------|----------------------|---------------------------------------|
|         | Glyceline                                                     | Reline <sup>17</sup> | 1 wt% water in glycerol <sup>19</sup> |
| 298     | $16.20 \pm 0.00_1$                                            | $18.20 \pm 0.00_2$   | $16.70 \pm 0.00_1$                    |
| 313     | $16.50 \pm 0.00_1$                                            | $18.20 \pm 0.00_2$   | $17.20 \pm 0.00_1$                    |
| 328     | $16.40 \pm 0.00_1$                                            | $19.00 \pm 0.00_2$   | $17.50 \pm 0.00_1$                    |
| 343     | $16.20 \pm 0.00_1$                                            | $18.90 \pm 0.00_2$   | $17.40 \pm 0.00_1$                    |
| 358     | $16.00 \pm 0.00_1$                                            | $18.90 \pm 0.00_2$   | $17.20 \pm 0.00_1$                    |

**Table S3:** Comparison of dynamic viscosity data obtained in this work with the data provided in the literature for Glyceline at different temperatures.

| $T$ (K) | This work | Literature <sup>a</sup> | Literature <sup>b</sup> |
|---------|-----------|-------------------------|-------------------------|
| 298     | 387.93    | 345.7                   | 369                     |
| 313     | 156.49    | -                       | 146                     |
| 328     | 74.45     | 60.2                    | 71.8                    |
| 343     | 40.48     | -                       | 39.6                    |
| 358     | 24.30     | -                       | 24.3                    |

<sup>a</sup>S. Barik, M. Chakraborty and M. Sarkar, *J. Phys. Chem. B*, 2020, **124**, 2864–2878.

<sup>b</sup>V. Agicenko and R. Buchner, *J. Chem. Eng. Data*, 2021, **66**, 780–792.

**Table S4:** Recovered empirical VFT parameters from the analysis of  $\ln(\eta/\text{mPa}\cdot\text{s})$  vs  $1/T$  ( $\text{K}^{-1}$ ) for LiCl-added Glyceline mixtures and corresponding activation energy of viscous flow ( $E_{a,\eta}$ ) at 298 K.

| $m_{\text{LiCl}}$<br>(mol.kg <sup>-1</sup> ) | (-) $A$ | $B$     | $T_0$ (K) | $R^2$ | $E_{a,\eta}$<br>(kJ.mol <sup>-1</sup> ) |
|----------------------------------------------|---------|---------|-----------|-------|-----------------------------------------|
| <b>0.0</b>                                   | 2.71    | 1108.43 | 170.38    | 0.999 | 50.18 ± 1.05                            |
| <b>0.5</b>                                   | 3.01    | 1273.87 | 164.60    | 0.999 | 52.79 ± 1.12                            |
| <b>1.0</b>                                   | 2.83    | 1284.88 | 169.45    | 0.999 | 57.33 ± 1.15                            |
| <b>1.5</b>                                   | 3.04    | 1399.62 | 168.75    | 0.998 | 61.78 ± 0.95                            |
| <b>2.0</b>                                   | 2.92    | 1403.77 | 174.52    | 0.998 | 67.88 ± 1.01                            |
| <b>2.5</b>                                   | 3.38    | 1596.43 | 169.71    | 0.999 | 71.53 ± 1.30                            |
| <b>3.0</b>                                   | 3.70    | 1738.34 | 168.71    | 0.998 | 76.68 ± 1.70                            |

**Table S5:** Comparison of activation energy of viscous flow ( $E_{a,\eta}$ ) for LiCl-added Glyceline, Reline, and 1 wt% water in glycerol, respectively, at 298 K.

| $m_{LiCl}$<br>(mol.kg <sup>-1</sup> ) | $E_{a,\eta}$ (kJ.mol <sup>-1</sup> ) |                      |                                       |
|---------------------------------------|--------------------------------------|----------------------|---------------------------------------|
|                                       | Glyceline                            | Reline <sup>17</sup> | 1 wt% water in glycerol <sup>19</sup> |
| <b>0.00</b>                           | 50.18 ± 1.05                         | 52.87 ± 1.89         | 51.73 ± 1.44                          |
| <b>0.42</b>                           | -                                    | 57.30 ± 1.84         | -                                     |
| <b>0.50</b>                           | 52.79 ± 1.12                         | -                    | 53.32 ± 1.48                          |
| <b>0.83</b>                           | -                                    | 57.82 ± 1.86         | -                                     |
| <b>1.00</b>                           | 57.33 ± 1.15                         | -                    | 54.81 ± 1.49                          |
| <b>1.26</b>                           | -                                    | 58.78 ± 0.63         | -                                     |
| <b>1.50</b>                           | 61.78 ± 0.95                         | -                    | 55.33 ± 0.97                          |
| <b>1.67</b>                           | -                                    | 64.61 ± 0.64         | -                                     |
| <b>2.00</b>                           | 67.88 ± 1.01                         | -                    | 55.62 ± 0.80                          |
| <b>2.10</b>                           | -                                    | 68.40 ± 0.67         | -                                     |
| <b>2.50</b>                           | 71.53 ± 1.30                         | -                    | 57.27 ± 0.54                          |
| <b>3.00</b>                           | 76.68 ± 1.70                         | -                    | 57.30 ± 0.76                          |

**Table S6:** Linear regression analysis of  $\ln(\eta/\text{mPa}\cdot\text{s})$  vs  $m_{\text{LiCl}}$  ( $\text{mol}\cdot\text{kg}^{-1}$ ) data for LiCl-added Glyceline, Reline, and 1 wt% water in glycerol, respectively.

| $T$ (K)    | Slope ( $\text{mol}^{-1}\cdot\text{kg}$ ) |                      |                                       |
|------------|-------------------------------------------|----------------------|---------------------------------------|
|            | Glyceline                                 | Reline <sup>17</sup> | 1 wt% water in glycerol <sup>19</sup> |
| <b>298</b> | $1.21 \pm 0.15$                           | -                    | -                                     |
| <b>313</b> | $1.08 \pm 0.11$                           | -                    | $0.68 \pm 0.01$                       |
| <b>328</b> | $0.96 \pm 0.11$                           | $1.41 \pm 0.13$      | $0.63 \pm 0.01$                       |
| <b>343</b> | $0.85 \pm 0.10$                           | $1.26 \pm 0.10$      | $0.59 \pm 0.02$                       |
| <b>358</b> | $0.76 \pm 0.10$                           | $1.10 \pm 0.09$      | $0.54 \pm 0.02$                       |



**Table S7:** Recovered excited-state intensity decay parameters for pyrene (10  $\mu\text{M}$ ; excitation with 340 nm Nano-LED; emission collected at 373 nm) dissolved in LiCl-added Glyceline. Errors associated with decay times are  $\leq \pm 2\%$ .

| $T$ (K) | $m_{\text{LiCl}}$<br>(mol.kg <sup>-1</sup> ) | 0.0    | 0.5    | 1.0    | 1.5    | 2.0    | 2.5    | 3.0    |
|---------|----------------------------------------------|--------|--------|--------|--------|--------|--------|--------|
|         |                                              |        |        |        |        |        |        |        |
| 298     | $\tau_1$                                     | 88.0   | 87.3   | 86.2   | 81.2   | 5.27   | 79.5   | 79.9   |
|         | ( $\alpha_1$ )                               | (1.5)  | (3.0)  | (0.6)  | (1.3)  | (0.3)  | (2.6)  | (2.8)  |
|         | $\tau_2$                                     | 195    | 195    | 187    | 183    | 181    | 181    | 179    |
|         | ( $\alpha_2$ )                               | (98.5) | (97.0) | (99.4) | (98.7) | (99.7) | (97.4) | (97.2) |
|         | $\chi^2$                                     | 1.07   | 1.08   | 1.05   | 1.09   | 1.11   | 1.10   | 1.07   |
| 313     | $\tau_1$                                     | 84.2   | 80.8   | 81.6   | 82.4   | 79.6   | 76.78  | 79.1   |
|         | ( $\alpha_1$ )                               | (1.3)  | (3.0)  | (0.3)  | (1.2)  | (2.4)  | (1.9)  | (1.8)  |
|         | $\tau_2$                                     | 184    | 184    | 175    | 171    | 173    | 169    | 166    |
|         | ( $\alpha_2$ )                               | (98.7) | (97.0) | (99.7) | (98.8) | (97.6) | (98.1) | (98.2) |
|         | $\chi^2$                                     | 1.09   | 1.03   | 1.08   | 1.07   | 1.13   | 1.09   | 1.13   |
| 328     | $\tau_1$                                     | 81.4   | 80.7   | 78.5   | 78.7   | 72.9   | 77.6   | 74.5   |
|         | ( $\alpha_1$ )                               | (1.3)  | (4.0)  | (1.1)  | (0.7)  | (2.5)  | (1.9)  | (1.7)  |
|         | $\tau_2$                                     | 173    | 175    | 165    | 161    | 162    | 159    | 155    |
|         | ( $\alpha_2$ )                               | (98.7) | (96.0) | (98.9) | (99.3) | (97.5) | (98.1) | (98.3) |
|         | $\chi^2$                                     | 1.07   | 1.08   | 1.05   | 1.07   | 1.16   | 1.10   | 1.14   |
| 343     | $\tau_1$                                     | 77.3   | 73.0   | 72.5   | 72.9   | 68.9   | 72.0   | 70.7   |
|         | ( $\alpha_1$ )                               | (1.8)  | (1.1)  | (1.3)  | (1.1)  | (2.6)  | (1.1)  | (1.9)  |
|         | $\tau_2$                                     | 163    | 158    | 156    | 150    | 152    | 147    | 146    |
|         | ( $\alpha_2$ )                               | (98.2) | (98.9) | (98.7) | (98.9) | (97.4) | (98.9) | (98.1) |
|         | $\chi^2$                                     | 1.03   | 1.05   | 1.06   | 1.06   | 1.13   | 1.14   | 1.13   |
| 358     | $\tau_1$                                     | 72.8   | 67.4   | 69.5   | 70.7   | 67.0   | 74.5   | 69.1   |
|         | ( $\alpha_1$ )                               | (1.8)  | (1.9)  | (0.3)  | (2.0)  | (3.4)  | (1.0)  | (1.3)  |
|         | $\tau_2$                                     | 151    | 148    | 144    | 142    | 144    | 137    | 135    |
|         | ( $\alpha_2$ )                               | (98.2) | (98.1) | (99.7) | (98.0) | (96.6) | (99.0) | (98.7) |
|         | $\chi^2$                                     | 1.05   | 1.09   | 1.05   | 1.11   | 1.15   | 1.05   | 1.12   |

**Table S8:** Recovered excited-state intensity decay parameters for pyrene (10  $\mu\text{M}$ ; excitation with 340 nm Nano-LED; emission collected at 373 nm) dissolved in the LiCl-added Glycine at varying quencher ( $\text{CH}_3\text{NO}_2$ ) concentration. Errors associated with decay times are  $\leq \pm 2\%$ .

$T$  (K) = 298

| $m_{\text{LiCl}}$<br>(mol.kg <sup>-1</sup> ) |                | 0.0    | 0.5    | 1.0    | 1.5    | 2.0    | 2.5    | 3.0    |
|----------------------------------------------|----------------|--------|--------|--------|--------|--------|--------|--------|
| [CH <sub>3</sub> NO <sub>2</sub> ]<br>(M)    |                |        |        |        |        |        |        |        |
| <b>0.00</b>                                  | $\tau_1$       | 88.0   | 87.3   | 86.2   | 81.2   | 5.27   | 79.5   | 79.9   |
|                                              | ( $\alpha_1$ ) | (1.5)  | (3.0)  | (0.6)  | (1.3)  | (0.3)  | (2.6)  | (2.8)  |
|                                              | $\tau_2$       | 195    | 195    | 187    | 183    | 181    | 181    | 179    |
|                                              | ( $\alpha_2$ ) | (98.5) | (97.0) | (99.4) | (98.7) | (99.7) | (97.4) | (97.2) |
|                                              | $\chi^2$       | 1.07   | 1.08   | 1.05   | 1.09   | 1.11   | 1.10   | 1.07   |
| <b>0.05</b>                                  | $\tau_1$       | 58.9   | 15.3   | 19.4   | 10.5   | 25.9   | 3.95   | 2.20   |
|                                              | ( $\alpha_1$ ) | (8.4)  | (1.8)  | (1.8)  | (1.0)  | (1.8)  | (0.5)  | (0.6)  |
|                                              | $\tau_2$       | 124    | 127    | 142    | 149    | 164    | 163    | 163    |
|                                              | ( $\alpha_2$ ) | (91.6) | (98.2) | (98.2) | (99.0) | (98.2) | (99.5) | (99.4) |
|                                              | $\chi^2$       | 1.03   | 1.08   | 1.14   | 1.11   | 1.12   | 1.12   | 1.05   |
| <b>0.11</b>                                  | $\tau_1$       | 16.2   | 28.9   | 19.8   | 25.3   | 24.4   | 22.5   | 8.01   |
|                                              | ( $\alpha_1$ ) | (3.2)  | (7.2)  | (3.4)  | (3.4)  | (2.3)  | (2.6)  | (1.7)  |
|                                              | $\tau_2$       | 80.5   | 98.3   | 114    | 128    | 150    | 152    | 150    |
|                                              | ( $\alpha_2$ ) | (96.8) | (92.8) | (96.6) | (96.6) | (97.7) | (97.4) | (98.3) |
|                                              | $\chi^2$       | 1.03   | 1.08   | 1.08   | 1.08   | 1.20   | 1.14   | 1.14   |
| <b>0.16</b>                                  | $\tau_1$       | 7.67   | 13.6   | 12.1   | 19.8   | 13.8   | 10.8   | 3.47   |
|                                              | ( $\alpha_1$ ) | (2.8)  | (4.9)  | (3.7)  | (4.7)  | (2.2)  | (2.2)  | (2.3)  |
|                                              | $\tau_2$       | 59.9   | 76.3   | 93.2   | 112    | 137    | 138    | 139    |
|                                              | ( $\alpha_2$ ) | (97.2) | (95.1) | (96.3) | (95.3) | (97.8) | (97.8) | (97.7) |
|                                              | $\chi^2$       | 1.13   | 1.03   | 1.02   | 1.16   | 1.18   | 1.20   | 1.17   |
| <b>0.21</b>                                  | $\tau_1$       | 5.77   | 10.2   | 8.70   | 19.5   | 17.0   | 13.9   | 3.00   |
|                                              | ( $\alpha_1$ ) | (3.8)  | (5.2)  | (4.2)  | (6.7)  | (4.1)  | (3.5)  | (3.0)  |
|                                              | $\tau_2$       | 48.0   | 60.7   | 78.8   | 100    | 120    | 128    | 131    |
|                                              | ( $\alpha_2$ ) | (96.2) | (94.8) | (95.8) | (93.3) | (95.9) | (96.5) | (97.0) |
|                                              | $\chi^2$       | 1.07   | 1.11   | 1.06   | 1.18   | 1.11   | 1.15   | 1.19   |

|             |              |        |        |        |        |        |        |        |
|-------------|--------------|--------|--------|--------|--------|--------|--------|--------|
| <b>0.27</b> | $\tau_1$     | 5.39   | 7.49   | 11.6   | 15.8   | 17.3   | 14.8   | 2.92   |
|             | $(\alpha_1)$ | (5.0)  | (5.7)  | (6.9)  | (7.1)  | (5.4)  | (4.4)  | (3.9)  |
|             | $\tau_2$     | 39.4   | 52.3   | 69.2   | 88.5   | 109    | 120    | 123    |
|             | $(\alpha_2)$ | (95.0) | (94.3) | (93.1) | (92.9) | (94.6) | (95.6) | (96.1) |
|             | $\chi^2$     | 1.14   | 1.02   | 1.09   | 1.20   | 1.09   | 1.14   | 1.17   |
| <b>0.32</b> | $\tau_1$     | 5.76   | 3.96   | 7.83   | 13.8   | 15.3   | 12.7   | 2.68   |
|             | $(\alpha_1)$ | (6.9)  | (5.0)  | (6.4)  | (7.2)  | (5.9)  | (5.0)  | (4.6)  |
|             | $\tau_2$     | 33.7   | 43.3   | 60.3   | 79.2   | 99.7   | 113    | 114    |
|             | $(\alpha_2)$ | (93.1) | (95.0) | (93.6) | (92.8) | (94.1) | (95.0) | (95.4) |
|             | $\chi^2$     | 1.00   | 1.23   | 1.16   | 1.19   | 1.10   | 1.19   | 1.22   |
| <b>0.37</b> | $\tau_1$     | 4.82   | 4.26   | 7.48   | 10.2   | 9.66   | 11.3   | 2.45   |
|             | $(\alpha_1)$ | (7.6)  | (5.8)  | (7.7)  | (7.6)  | (5.1)  | (5.3)  | (3.6)  |
|             | $\tau_2$     | 28.8   | 38.2   | 53.8   | 69.2   | 90.2   | 105    | 108    |
|             | $(\alpha_2)$ | (92.4) | (94.2) | (92.3) | (92.4) | (94.9) | (94.7) | (96.4) |
|             | $\chi^2$     | 1.12   | 1.11   | 1.18   | 1.27   | 1.19   | 1.16   | 1.20   |

**$T$  (K) = 313**

|                     |              | $m_{LiCl}$<br>(mol.kg <sup>-1</sup> ) |            |            |            |            |            |            |
|---------------------|--------------|---------------------------------------|------------|------------|------------|------------|------------|------------|
| $[CH_3NO_2]$<br>(M) |              | <b>0.0</b>                            | <b>0.5</b> | <b>1.0</b> | <b>1.5</b> | <b>2.0</b> | <b>2.5</b> | <b>3.0</b> |
| <b>0.00</b>         | $\tau_1$     | 84.2                                  | 80.8       | 81.6       | 82.4       | 79.6       | 76.78      | 79.1       |
|                     | $(\alpha_1)$ | (1.3)                                 | (3.0)      | (0.3)      | (1.2)      | (2.4)      | (1.9)      | (1.8)      |
|                     | $\tau_2$     | 184                                   | 184        | 175        | 171        | 173        | 169        | 166        |
|                     | $(\alpha_2)$ | (98.7)                                | (97.0)     | (99.7)     | (98.8)     | (97.6)     | (98.1)     | (98.2)     |
|                     | $\chi^2$     | 1.09                                  | 1.03       | 1.08       | 1.07       | 1.13       | 1.09       | 1.13       |
| <b>0.05</b>         | $\tau_1$     | 7.58                                  | 26.1       | 15.7       | 9.32       | 56.9       | 7.47       | 4.23       |
|                     | $(\alpha_1)$ | (1.1)                                 | (4.8)      | (2.0)      | (1.2)      | (8.7)      | (0.9)      | (0.7)      |
|                     | $\tau_2$     | 76.0                                  | 86.7       | 103        | 114        | 137        | 140        | 142        |
|                     | $(\alpha_2)$ | (98.9)                                | (95.2)     | (98.0)     | (98.8)     | (91.3)     | (99.1)     | (99.3)     |
|                     | $\chi^2$     | 1.01                                  | 0.98       | 1.02       | 1.07       | 1.12       | 1.09       | 1.08       |
| <b>0.11</b>         | $\tau_1$     | 8.23                                  | 7.21       | 11.5       | 10.7       | 8.93       | 15.7       | 6.08       |
|                     | $(\alpha_1)$ | (3.5)                                 | (3.1)      | (3.7)      | (2.8)      | (1.6)      | (2.4)      | (1.7)      |

|             |              |        |        |        |        |        |        |        |
|-------------|--------------|--------|--------|--------|--------|--------|--------|--------|
|             | $\tau_2$     | 46.0   | 54.9   | 71.7   | 85.1   | 112    | 118    | 118    |
|             | $(\alpha_2)$ | (96.5) | (96.9) | (96.3) | (97.2) | (98.4) | (97.6) | (98.3) |
|             | $\chi^2$     | 1.06   | 1.01   | 1.03   | 1.06   | 1.06   | 1.06   | 1.16   |
| <b>0.16</b> | $\tau_1$     | 5.82   | 6.87   | 8.04   | 12.8   | 8.23   | 17.2   | 3.41   |
|             | $(\alpha_1)$ | (4.6)  | (5.1)  | (4.9)  | (5.5)  | (2.2)  | (4.5)  | (3.0)  |
|             | $\tau_2$     | 32.3   | 41.2   | 54.1   | 69.1   | 96.0   | 101    | 104    |
|             | $(\alpha_2)$ | (95.4) | (94.9) | (95.1) | (94.5) | (97.8) | (95.5) | (97.0) |
|             | $\chi^2$     | 1.04   | 1.01   | 1.05   | 1.12   | 1.09   | 1.10   | 1.15   |
| <b>0.21</b> | $\tau_1$     | 5.20   | 4.51   | 6.35   | 7.98   | 10.4   | 11.6   | 1.89   |
|             | $(\alpha_1)$ | (7.6)  | (5.5)  | (6.4)  | (5.7)  | (4.3)  | (4.9)  | (3.8)  |
|             | $\tau_2$     | 25.5   | 31.6   | 43.3   | 56.3   | 77.2   | 88.6   | 93.0   |
|             | $(\alpha_2)$ | (92.4) | (94.5) | (93.6) | (94.3) | (95.7) | (95.1) | (96.2) |
|             | $\chi^2$     | 1.05   | 1.10   | 1.05   | 1.09   | 1.11   | 1.13   | 1.15   |
| <b>0.27</b> | $\tau_1$     | 4.20   | 3.62   | 4.87   | 6.87   | 7.87   | 15.8   | 2.88   |
|             | $(\alpha_1)$ | (8.7)  | (6.2)  | (6.3)  | (6.2)  | (5.0)  | (8.3)  | (5.0)  |
|             | $\tau_2$     | 20.4   | 26.4   | 35.3   | 47.4   | 64.9   | 80.6   | 83.4   |
|             | $(\alpha_2)$ | (91.3) | (93.8) | (93.7) | (93.8) | (95.0) | (91.7) | (95.0) |
|             | $\chi^2$     | 1.12   | 1.05   | 1.14   | 1.12   | 1.15   | 1.13   | 1.20   |
| <b>0.32</b> | $\tau_1$     | 4.69   | 3.58   | 5.06   | 4.84   | 6.62   | 6.49   | 2.59   |
|             | $(\alpha_1)$ | (15.3) | (9.4)  | (8.9)  | (6.7)  | (5.9)  | (5.0)  | (6.1)  |
|             | $\tau_2$     | 17.7   | 22.3   | 30.3   | 41.1   | 56.9   | 69.0   | 74.3   |
|             | $(\alpha_2)$ | (84.7) | (90.6) | (91.1) | (93.3) | (94.1) | (95.0) | (93.9) |
|             | $\chi^2$     | 1.21   | 1.14   | 1.13   | 1.15   | 1.14   | 1.16   | 1.26   |
| <b>0.37</b> | $\tau_1$     | 3.68   | 3.69   | 4.27   | 6.51   | 5.86   | 5.76   | 2.35   |
|             | $(\alpha_1)$ | (14.2) | (12.5) | (10.8) | (10.8) | (6.8)  | (6.0)  | (5.7)  |
|             | $\tau_2$     | 14.8   | 19.7   | 27.1   | 36.7   | 51.4   | 62.6   | 65.7   |
|             | $(\alpha_2)$ | (85.8) | (87.5) | (89.2) | (89.2) | (93.2) | (94.0) | (94.3) |
|             | $\chi^2$     | 1.20   | 1.13   | 1.19   | 1.09   | 1.17   | 1.16   | 1.15   |

$T \text{ (K)} = 328$

|             |                                    | $m_{LiCl}$              |        |        |        |        |        |        |
|-------------|------------------------------------|-------------------------|--------|--------|--------|--------|--------|--------|
|             |                                    | (mol.kg <sup>-1</sup> ) |        |        |        |        |        |        |
|             | [CH <sub>3</sub> NO <sub>2</sub> ] | 0.0                     | 0.5    | 1.0    | 1.5    | 2.0    | 2.5    | 3.0    |
|             | (M)                                |                         |        |        |        |        |        |        |
| <b>0.00</b> | $\tau_1$                           | 81.4                    | 80.7   | 78.5   | 78.7   | 72.9   | 77.6   | 74.5   |
|             | ( $\alpha_1$ )                     | (1.3)                   | (4.0)  | (1.1)  | (0.7)  | (2.5)  | (1.9)  | (1.7)  |
|             | $\tau_2$                           | 173                     | 175    | 165    | 161    | 162    | 159    | 155    |
|             | ( $\alpha_2$ )                     | (98.7)                  | (96.0) | (98.9) | (99.3) | (97.5) | (98.1) | (98.3) |
|             | $\chi^2$                           | 1.07                    | 1.08   | 1.05   | 1.07   | 1.16   | 1.10   | 1.14   |
| <b>0.05</b> | $\tau_1$                           | 4.58                    | 6.98   | 7.06   | 6.01   | 7.21   | 19.3   | 3.78   |
|             | ( $\alpha_1$ )                     | (1.2)                   | (2.0)  | (1.7)  | (1.3)  | (1.2)  | (2.2)  | (0.8)  |
|             | $\tau_2$                           | 47.0                    | 53.4   | 68.7   | 78.4   | 94.4   | 111    | 116    |
|             | ( $\alpha_2$ )                     | (98.8)                  | (98.0) | (98.3) | (98.7) | (98.8) | (97.8) | (99.2) |
|             | $\chi^2$                           | 1.07                    | 1.01   | 0.99   | 1.04   | 1.06   | 1.07   | 1.06   |
| <b>0.11</b> | $\tau_1$                           | 5.28                    | 4.63   | 5.25   | 7.69   | 10.6   | 8.23   | 7.71   |
|             | ( $\alpha_1$ )                     | (4.3)                   | (3.9)  | (3.2)  | (3.3)  | (2.6)  | (2.1)  | (2.8)  |
|             | $\tau_2$                           | 26.4                    | 31.6   | 41.6   | 52.5   | 76.4   | 81.1   | 84.2   |
|             | ( $\alpha_2$ )                     | (95.7)                  | (96.1) | (96.8) | (96.7) | (97.4) | (97.9) | (97.2) |
|             | $\chi^2$                           | 1.15                    | 1.08   | 1.01   | 1.05   | 1.06   | 1.04   | 1.10   |
| <b>0.16</b> | $\tau_1$                           | 4.78                    | 4.44   | 5.09   | 6.82   | 6.39   | 11.7   | 2.39   |
|             | ( $\alpha_1$ )                     | (8.2)                   | (6.5)  | (6.2)  | (6.1)  | (3.2)  | (5.9)  | (3.8)  |
|             | $\tau_2$                           | 18.6                    | 22.9   | 30.4   | 39.4   | 62.4   | 65.0   | 68.3   |
|             | ( $\alpha_2$ )                     | (91.8)                  | (93.5) | (93.8) | (93.9) | (96.8) | (94.0) | (96.2) |
|             | $\chi^2$                           | 1.03                    | 1.09   | 1.06   | 1.04   | 1.01   | 1.06   | 1.15   |
| <b>0.21</b> | $\tau_1$                           | 4.29                    | 3.63   | 3.23   | 5.61   | 6.13   | 6.73   | 1.18   |
|             | ( $\alpha_1$ )                     | (14.9)                  | (9.8)  | (7.4)  | (7.7)  | (5.2)  | (5.6)  | (4.9)  |
|             | $\tau_2$                           | 14.4                    | 17.8   | 23.5   | 31.1   | 45.5   | 52.3   | 55.8   |
|             | ( $\alpha_2$ )                     | (85.1)                  | (90.2) | (92.6) | (92.3) | (94.8) | (94.4) | (95.1) |
|             | $\chi^2$                           | 1.06                    | 1.20   | 1.02   | 1.11   | 1.10   | 1.09   | 1.24   |
| <b>0.27</b> | $\tau_1$                           | 3.11                    | 4.06   | 5.00   | 3.93   | 5.54   | 5.19   | 2.24   |
|             | ( $\alpha_1$ )                     | (12.9)                  | (15.1) | (13.6) | (7.8)  | (7.9)  | (6.4)  | (6.6)  |
|             | $\tau_2$                           | 11.1                    | 14.7   | 19.7   | 25.4   | 36.6   | 44.0   | 48.4   |

|             |              |        |        |        |        |        |        |        |
|-------------|--------------|--------|--------|--------|--------|--------|--------|--------|
|             | $(\alpha_2)$ | (87.1) | (84.9) | (86.4) | (92.2) | (92.1) | (93.6) | (93.4) |
|             | $\chi^2$     | 1.12   | 1.10   | 1.10   | 1.16   | 1.13   | 1.03   | 1.16   |
| <b>0.32</b> | $\tau_1$     | 2.26   | 3.26   | 3.14   | 3.33   | 3.36   | 3.06   | 1.88   |
|             | $(\alpha_1)$ | (13.3) | (17.4) | (12.9) | (9.5)  | (6.8)  | (5.7)  | (8.2)  |
|             | $\tau_2$     | 8.93   | 12.2   | 16.2   | 21.8   | 30.2   | 38.0   | 41.9   |
|             | $(\alpha_2)$ | (86.7) | (82.6) | (87.1) | (90.5) | (93.2) | (94.3) | (91.3) |
|             | $\chi^2$     | 1.09   | 1.17   | 1.04   | 1.08   | 1.06   | 1.10   | 1.25   |
| <b>0.37</b> | $\tau_1$     | 1.79   | 2.26   | 2.77   | 2.78   | 2.74   | 3.62   | 1.56   |
|             | $(\alpha_1)$ | (12.8) | (14.9) | (14.5) | (11.7) | (7.7)  | (9.3)  | (7.6)  |
|             | $\tau_2$     | 7.38   | 10.1   | 14.0   | 18.7   | 26.1   | 34.0   | 36.3   |
|             | $(\alpha_2)$ | (87.2) | (85.1) | (85.5) | (88.3) | (92.3) | (90.7) | (92.4) |
|             | $\chi^2$     | 0.93   | 1.19   | 1.03   | 1.22   | 1.25   | 1.14   | 1.17   |

**$T$  (K) = 343**

| $m_{LiCl}$<br>(mol.kg <sup>-1</sup> ) |              | <b>0.0</b> | <b>0.5</b> | <b>1.0</b> | <b>1.5</b> | <b>2.0</b> | <b>2.5</b> | <b>3.0</b> |
|---------------------------------------|--------------|------------|------------|------------|------------|------------|------------|------------|
| <b>0.00</b>                           | $\tau_1$     | 77.3       | 73.0       | 72.5       | 72.9       | 68.9       | 72.0       | 70.7       |
|                                       | $(\alpha_1)$ | (1.8)      | (1.1)      | (1.3)      | (1.1)      | (2.6)      | (1.1)      | (1.9)      |
|                                       | $\tau_2$     | 163        | 158        | 156        | 150        | 152        | 147        | 146        |
|                                       | $(\alpha_2)$ | (98.2)     | (98.9)     | (98.7)     | (98.9)     | (97.4)     | (98.9)     | (98.1)     |
|                                       | $\chi^2$     | 1.03       | 1.05       | 1.06       | 1.06       | 1.13       | 1.14       | 1.13       |
| <b>0.05</b>                           | $\tau_1$     | 4.29       | 4.54       | 3.31       | 3.54       | 8.52       | 8.30       | 5.39       |
|                                       | $(\alpha_1)$ | (2.2)      | (2.1)      | (1.5)      | (1.4)      | (2.1)      | (1.8)      | (1.3)      |
|                                       | $\tau_2$     | 29.1       | 35.5       | 44.2       | 51.3       | 65.1       | 79.1       | 88.1       |
|                                       | $(\alpha_2)$ | (97.8)     | (97.9)     | (98.6)     | (98.6)     | (97.9)     | (98.2)     | (98.7)     |
|                                       | $\chi^2$     | 1.03       | 1.11       | 1.04       | 1.06       | 1.08       | 1.07       | 1.05       |
| <b>0.11</b>                           | $\tau_1$     | 3.42       | 4.34       | 5.29       | 4.36       | 5.29       | 5.37       | 5.11       |
|                                       | $(\alpha_1)$ | (5.7)      | (6.7)      | (7.3)      | (3.8)      | (2.7)      | (2.7)      | (3.1)      |
|                                       | $\tau_2$     | 16.9       | 20.8       | 25.7       | 31.5       | 48.6       | 51.9       | 54.0       |
|                                       | $(\alpha_2)$ | (94.3)     | (93.3)     | (92.7)     | (96.2)     | (97.3)     | (97.3)     | (96.9)     |
|                                       | $\chi^2$     | 1.12       | 1.17       | 1.05       | 1.15       | 1.09       | 1.04       | 1.06       |

|             |              |        |        |        |        |        |        |        |
|-------------|--------------|--------|--------|--------|--------|--------|--------|--------|
| <b>0.16</b> | $\tau_1$     | 3.27   | 3.28   | 3.99   | 2.68   | 5.02   | 3.60   | 2.09   |
|             | $(\alpha_1)$ | (11.2) | (8.8)  | (10.1) | (5.9)  | (4.2)  | (4.1)  | (5.5)  |
|             | $\tau_2$     | 11.2   | 14.1   | 18.1   | 22.3   | 37.7   | 37.0   | 41.0   |
|             | $(\alpha_2)$ | (88.8) | (91.2) | (89.9) | (94.1) | (95.8) | (95.9) | (94.5) |
|             | $\chi^2$     | 1.14   | 1.23   | 1.02   | 1.15   | 1.09   | 1.07   | 1.18   |
| <b>0.21</b> | $\tau_1$     | 1.68   | 2.92   | 3.12   | 2.49   | 3.31   | 4.52   | 2.79   |
|             | $(\alpha_1)$ | (7.4)  | (14.6) | (12.3) | (8.0)  | (5.6)  | (7.2)  | (8.0)  |
|             | $\tau_2$     | 8.00   | 10.7   | 13.5   | 17.3   | 25.4   | 29.9   | 33.3   |
|             | $(\alpha_2)$ | (92.6) | (85.4) | (87.7) | (92.0) | (94.4) | (92.8) | (92.0) |
|             | $\chi^2$     | 1.08   | 1.03   | 1.16   | 1.16   | 1.10   | 1.08   | 1.19   |
| <b>0.27</b> | $\tau_1$     | 2.16   | 2.09   | 2.61   | 2.81   | 4.00   | 2.40   | 1.65   |
|             | $(\alpha_1)$ | (12.7) | (13.9) | (13.3) | (12.2) | (10.6) | (7.1)  | (9.4)  |
|             | $\tau_2$     | 6.53   | 8.44   | 10.7   | 14.2   | 20.6   | 24.0   | 27.1   |
|             | $(\alpha_2)$ | (87.3) | (86.1) | (86.7) | (87.8) | (89.4) | (92.9) | (90.6) |
|             | $\chi^2$     | 1.07   | 1.07   | 1.09   | 1.21   | 1.14   | 1.07   | 1.26   |
| <b>0.32</b> | $\tau_1$     | 0.91   | 0.92   | 1.77   | 1.57   | 2.98   | 2.61   | 1.59   |
|             | $(\alpha_1)$ | (10.6) | (10.4) | (14.4) | (9.9)  | (12.3) | (9.4)  | (11.8) |
|             | $\tau_2$     | 5.2    | 6.6    | 9.0    | 11.6   | 17.0   | 21.5   | 23.3   |
|             | $(\alpha_2)$ | (89.4) | (89.6) | (85.6) | (90.1) | (87.7) | (90.6) | (88.2) |
|             | $\chi^2$     | 0.99   | 0.99   | 1.22   | 1.28   | 1.07   | 1.13   | 1.16   |
| <b>0.37</b> | $\tau_1$     | 1.07   | 1.13   | 1.39   | 1.87   | 2.26   | 2.38   | 1.80   |
|             | $(\alpha_1)$ | (12.8) | (14.2) | (14.5) | (15.4) | (13.0) | (11.6) | (11.1) |
|             | $\tau_2$     | 4.52   | 5.55   | 7.38   | 10.4   | 14.4   | 18.3   | 20.3   |
|             | $(\alpha_2)$ | (87.2) | (85.8) | (85.5) | (84.6) | (87.0) | (88.4) | (88.9) |
|             | $\chi^2$     | 0.88   | 0.96   | 1.11   | 1.28   | 1.23   | 1.30   | 1.26   |

$T \text{ (K)} = 358$

|             |              | $m_{LiCl}$              |        |        |        |        |        |        |
|-------------|--------------|-------------------------|--------|--------|--------|--------|--------|--------|
|             |              | (mol.kg <sup>-1</sup> ) |        |        |        |        |        |        |
|             | $[CH_3NO_2]$ | 0.0                     | 0.5    | 1.0    | 1.5    | 2.0    | 2.5    | 3.0    |
|             | (M)          |                         |        |        |        |        |        |        |
| <b>0.00</b> | $\tau_1$     | 72.8                    | 67.4   | 69.5   | 70.7   | 67.0   | 74.5   | 69.1   |
|             | $(\alpha_1)$ | (1.8)                   | (1.9)  | (0.3)  | (2.0)  | (3.4)  | (1.0)  | (1.3)  |
|             | $\tau_2$     | 151                     | 148    | 144    | 142    | 144    | 137    | 135    |
|             | $(\alpha_2)$ | (98.2)                  | (98.1) | (99.7) | (98.0) | (96.6) | (99.0) | (98.7) |
|             | $\chi^2$     | 1.05                    | 1.09   | 1.05   | 1.11   | 1.15   | 1.05   | 1.12   |
| <b>0.05</b> | $\tau_1$     | 3.42                    | 4.14   | 3.33   | 3.17   | 6.01   | 4.08   | 4.23   |
|             | $(\alpha_1)$ | (3.8)                   | (3.2)  | (2.5)  | (2.1)  | (2.7)  | (1.6)  | (1.4)  |
|             | $\tau_2$     | 19.5                    | 23.6   | 29.0   | 33.6   | 43.8   | 54.4   | 62.1   |
|             | $(\alpha_2)$ | (96.2)                  | (96.8) | (97.5) | (97.9) | (97.3) | (98.4) | (98.6) |
|             | $\chi^2$     | 1.18                    | 1.17   | 1.09   | 1.09   | 1.03   | 1.09   | 1.11   |
| <b>0.11</b> | $\tau_1$     | 4.39                    | 4.22   | 3.81   | 4.48   | 4.05   | 3.86   | 3.14   |
|             | $(\alpha_1)$ | (15.4)                  | (12.5) | (8.5)  | (7.7)  | (4.0)  | (3.4)  | (3.5)  |
|             | $\tau_2$     | 11.0                    | 13.5   | 15.8   | 20.0   | 30.8   | 33.0   | 33.0   |
|             | $(\alpha_2)$ | (84.6)                  | (87.5) | (91.5) | (92.3) | (96.0) | (96.6) | (96.5) |
|             | $\chi^2$     | 1.10                    | 1.10   | 1.09   | 1.06   | 1.04   | 1.09   | 1.11   |
| <b>0.16</b> | $\tau_1$     | 2.17                    | 2.18   | 2.91   | 2.83   | 3.69   | 3.13   | 2.26   |
|             | $(\alpha_1)$ | (12.7)                  | (9.1)  | (12.7) | (9.4)  | (6.9)  | (6.1)  | (8.2)  |
|             | $\tau_2$     | 7.16                    | 8.48   | 10.9   | 13.4   | 22.5   | 22.3   | 24.9   |
|             | $(\alpha_2)$ | (87.3)                  | (90.9) | (87.3) | (90.6) | (93.1) | (93.9) | (91.8) |
|             | $\chi^2$     | 0.94                    | 1.00   | 0.94   | 1.10   | 1.15   | 1.03   | 1.25   |
| <b>0.21</b> | $\tau_1$     | 1.35                    | 1.14   | 1.92   | 1.86   | 2.35   | 2.59   | 1.93   |
|             | $(\alpha_1)$ | (8.9)                   | (9.5)  | (12.1) | (10.2) | (8.7)  | (8.8)  | (10.4) |
|             | $\tau_2$     | 5.16                    | 6.08   | 7.89   | 10.2   | 15.2   | 17.4   | 19.2   |
|             | $(\alpha_2)$ | (91.1)                  | (90.5) | (87.9) | (89.8) | (91.3) | (91.2) | (89.6) |
|             | $\chi^2$     | 0.89                    | 0.99   | 1.14   | 1.29   | 1.16   | 1.15   | 1.37   |
| <b>0.27</b> | $\tau_1$     | 1.36                    | 0.98   | 1.81   | 1.49   | 2.49   | 2.03   | 1.54   |
|             | $(\alpha_1)$ | (17.0)                  | (10.6) | (17.3) | (12.8) | (13.9) | (10.7) | (13.4) |
|             | $\tau_2$     | 4.14                    | 4.83   | 6.34   | 8.29   | 12.0   | 13.8   | 15.8   |



|             |              |        |        |        |        |        |        |        |
|-------------|--------------|--------|--------|--------|--------|--------|--------|--------|
|             | $(\alpha_2)$ | (83.0) | (89.4) | (82.7) | (87.2) | (86.1) | (89.3) | (86.6) |
|             | $\chi^2$     | 0.93   | 1.07   | 1.16   | 1.26   | 1.23   | 1.18   | 1.11   |
|             | $\tau_1$     | 1.09   | 0.95   | 1.43   | 1.43   | 1.45   | 1.89   | 1.23   |
| <b>0.32</b> | $(\alpha_1)$ | (16.4) | (14.3) | (17.2) | (17.1) | (12.5) | (12.7) | (11.4) |
|             | $\tau_2$     | 3.33   | 4.15   | 5.31   | 7.13   | 9.57   | 12.2   | 13.3   |
|             | $(\alpha_2)$ | (83.6) | (85.7) | (82.8) | (82.9) | (87.5) | (87.3) | (88.6) |
|             | $\chi^2$     | 0.97   | 1.08   | 1.03   | 1.25   | 1.25   | 1.36   | 1.32   |
|             | $\tau_1$     | 0.63   | 1.31   | 1.09   | 1.12   | 1.74   | 1.38   | 1.36   |
| <b>0.37</b> | $(\alpha_1)$ | (14.6) | (26.2) | (19.8) | (18.4) | (17.2) | (13.5) | (12.6) |
|             | $\tau_2$     | 2.79   | 3.78   | 4.58   | 5.89   | 8.28   | 9.90   | 10.4   |
|             | $(\alpha_2)$ | (85.4) | (73.8) | (80.2) | (81.6) | (82.8) | (86.5) | (87.4) |
|             | $\chi^2$     | 1.07   | 0.91   | 1.15   | 1.21   | 1.43   | 1.42   | 1.45   |
|             |              |        |        |        |        |        |        |        |

**Table S9:** Linear regression analysis of  $k_q$  ( $M^{-1}.s^{-1}$ ) vs  $m_{LiCl}$  ( $mol.kg^{-1}$ ) data for pyrene in LiCl-added Glyceline.

| $T$ (K) | Slope<br>( $kg.L.mol^{-2}.s^{-1}$ ) | $R^2$ |
|---------|-------------------------------------|-------|
| 298     | $0.22 \pm 0.03$                     | 0.944 |
| 313     | $0.47 \pm 0.06$                     | 0.939 |
| 328     | $0.91 \pm 0.12$                     | 0.920 |
| 343     | $1.54 \pm 0.17$                     | 0.916 |
| 358     | $2.34 \pm 0.25$                     | 0.883 |

**Table S10:** Recovered excited-state intensity decay parameters for pyrene (10  $\mu\text{M}$ ; excitation with 340 nm Nano-LED; emission collected at 373 nm) dissolved in the LiCl-added choline chloride : ethylene glycol (1 : 2) DES at varying quencher ( $\text{CH}_3\text{NO}_2$ ) concentration at 358 K. Errors associated with decay times are  $\leq \pm 2\%$ .

|                                       |              | $m_{\text{LiCl}}$      |            |            |            |            |            |            |
|---------------------------------------|--------------|------------------------|------------|------------|------------|------------|------------|------------|
|                                       |              | $(\text{mol.kg}^{-1})$ |            |            |            |            |            |            |
|                                       |              | <b>0.0</b>             | <b>0.5</b> | <b>1.0</b> | <b>1.5</b> | <b>2.0</b> | <b>2.5</b> | <b>3.0</b> |
| <b>[CH<sub>3</sub>NO<sub>2</sub>]</b> | <b>(M)</b>   |                        |            |            |            |            |            |            |
| <b>0.00</b>                           | $\tau_1$     | 52.1                   | 66.9       | 69.9       | 70.9       | 49.4       | 49.0       | 48.7       |
|                                       | $(\alpha_1)$ | (1.2)                  | (2.7)      | (2.2)      | (2.5)      | (0.7)      | (0.2)      | (0.9)      |
|                                       | $\tau_2$     | 147                    | 147        | 144        | 146        | 142        | 140        | 139        |
|                                       | $(\alpha_2)$ | (98.8)                 | (97.3)     | (97.8)     | (97.5)     | (99.3)     | (99.3)     | (99.1)     |
|                                       | $\chi^2$     | 1.10                   | 1.10       | 1.06       | 1.08       | 0.99       | 0.98       | 1.06       |
| <b>0.05</b>                           | $\tau_1$     | 1.60                   | 2.14       | 1.82       | 2.49       | 3.64       | 2.88       | 1.72       |
|                                       | $(\alpha_1)$ | (3.6)                  | (4.7)      | (3.1)      | (3.0)      | (4.4)      | (2.8)      | (1.9)      |
|                                       | $\tau_2$     | 9.78                   | 11.2       | 14.0       | 17.5       | 19.8       | 24.1       | 32.3       |
|                                       | $(\alpha_2)$ | (96.4)                 | (95.3)     | (96.9)     | (97.0)     | (95.6)     | (97.2)     | (98.1)     |
|                                       | $\chi^2$     | 1.26                   | 1.16       | 1.04       | 1.17       | 0.98       | 1.10       | 0.99       |
| <b>0.11</b>                           | $\tau_1$     | 1.88                   | 1.30       | 1.80       | 1.33       | 1.91       | 3.03       | 2.70       |
|                                       | $(\alpha_1)$ | (12.4)                 | (5.8)      | (7.8)      | (4.9)      | (6.7)      | (8.7)      | (5.3)      |
|                                       | $\tau_2$     | 5.01                   | 5.59       | 7.39       | 8.72       | 10.2       | 13.5       | 18.5       |
|                                       | $(\alpha_2)$ | (87.6)                 | (94.2)     | (92.2)     | (95.1)     | (93.3)     | (91.3)     | (94.7)     |
|                                       | $\chi^2$     | 0.98                   | 1.15       | 1.18       | 1.02       | 1.21       | 1.08       | 1.07       |
| <b>0.16</b>                           | $\tau_1$     | 0.43                   | 0.85       | 1.09       | 1.28       | 1.11       | 1.50       | 1.71       |
|                                       | $(\alpha_1)$ | (7.8)                  | (10.8)     | (7.6)      | (9.8)      | (8.5)      | (8.5)      | (7.1)      |
|                                       | $\tau_2$     | 3.13                   | 3.76       | 4.76       | 6.00       | 6.71       | 8.86       | 12.47      |
|                                       | $(\alpha_2)$ | (92.2)                 | (89.2)     | (92.4)     | (90.2)     | (91.5)     | (91.5)     | (92.9)     |
|                                       | $\chi^2$     | 0.99                   | 0.97       | 0.96       | 1.03       | 1.05       | 1.16       | 1.16       |
| <b>0.21</b>                           | $\tau_1$     | 0.63                   | 1.06       | 1.16       | 1.10       | 0.75       | 1.42       | 1.65       |
|                                       | $(\alpha_1)$ | (11.5)                 | (13.5)     | (14.6)     | (13.0)     | (11.1)     | (12.3)     | (10.2)     |
|                                       | $\tau_2$     | 2.42                   | 2.72       | 3.66       | 4.46       | 5.00       | 7.01       | 9.51       |
|                                       | $(\alpha_2)$ | (88.5)                 | (86.5)     | (85.4)     | (87.0)     | (88.9)     | (87.7)     | (89.8)     |
|                                       | $\chi^2$     | 1.12                   | 1.21       | 0.81       | 1.00       | 1.23       | 1.01       | 1.05       |
| <b>0.27</b>                           | $\tau_1$     | 0.43                   | 1.23       | 0.82       | 0.84       | 0.80       | 0.87       | 1.04       |

|             |              |        |        |        |        |        |        |        |
|-------------|--------------|--------|--------|--------|--------|--------|--------|--------|
|             | $(\alpha_1)$ | (16.5) | (35.7) | (16.6) | (15.9) | (15.3) | (14.5) | (12.0) |
|             | $\tau_2$     | 1.91   | 2.45   | 2.92   | 3.64   | 4.20   | 5.31   | 7.58   |
|             | $(\alpha_2)$ | (83.5) | (64.3) | (83.4) | (84.1) | (84.7) | (14.5) | (88.0) |
|             | $\chi^2$     | 1.17   | 1.08   | 0.85   | 1.04   | 1.20   | 85.52  | 1.04   |
|             | $\tau_1$     | 0.57   | 0.45   | 0.35   | 0.91   | 0.62   | 0.52   | 0.71   |
| <b>0.32</b> | $(\alpha_1)$ | (21.8) | (17.6) | (15.4) | (22.1) | (16.4) | (14.0) | (12.4) |
|             | $\tau_2$     | 1.61   | 1.84   | 2.30   | 3.12   | 3.35   | 4.27   | 6.23   |
|             | $(\alpha_2)$ | (78.2) | (82.4) | (84.6) | (77.9) | (83.6) | (86.0) | (87.6) |
|             | $\chi^2$     | 1.16   | 1.05   | 1.12   | 1.14   | 1.17   | 1.32   | 1.11   |
|             | $\tau_1$     | 0.48   | 0.65   | 0.29   | 0.21   | 0.37   | 0.23   | 0.47   |
| <b>0.37</b> | $(\alpha_1)$ | (25.9) | (25.1) | (20.0) | (18.7) | (17.1) | (17.8) | (14.8) |
|             | $\tau_2$     | 1.42   | 1.57   | 1.95   | 2.37   | 2.80   | 3.49   | 4.83   |
|             | $(\alpha_2)$ | (74.1) | (74.9) | (80.0) | (81.3) | (82.9) | (82.2) | (85.2) |
|             | $\chi^2$     | 1.14   | 1.08   | 1.02   | 1.10   | 1.14   | 1.20   | 1.19   |

**Table S11:** Stern-Volmer dynamic quenching constant,  $K_D$  ( $M^{-1}$ ), obtained from the linear regression analysis of  $\tau_0/\tau$  vs  $[CH_3NO_2]$  data and estimated bimolecular quenching rate constant  $k_q$  ( $M^{-1}.s^{-1}$ ) for pyrene-nitromethane fluorophore-quencher pair in choline chloride : ethylene glycol (1 : 2) DES at different LiCl concentrations and 358 K.

| $m_{LiCl}$ ( $mol.kg^{-1}$ ) | $K_D$ ( $M^{-1}$ ) | $k_q$ ( $M^{-1}.s^{-1}$ ) $\times 10^8$ | $R^2$ |
|------------------------------|--------------------|-----------------------------------------|-------|
| 0.0                          | $280.3 \pm 4.5$    | $19.00 \pm 1.05$                        | 0.999 |
| 0.5                          | $246.7 \pm 4.2$    | $16.80 \pm 0.95$                        | 0.999 |
| 1.0                          | $188.8 \pm 3.1$    | $13.10 \pm 0.89$                        | 0.994 |
| 1.5                          | $148.0 \pm 2.9$    | $10.10 \pm 0.70$                        | 0.998 |
| 2.0                          | $129.5 \pm 2.8$    | $9.10 \pm 0.62$                         | 0.995 |
| 2.5                          | $99.0 \pm 2.5$     | $7.00 \pm 0.60$                         | 0.988 |
| 3.0                          | $68.3 \pm 1.5$     | $4.90 \pm 0.50$                         | 0.984 |

**Table S12:** Recovered excited-state intensity decay parameters for pyrene (10  $\mu\text{M}$ ; excitation with 340 nm Nano-LED; emission collected at 373 nm) dissolved in the LiCl-added choline chloride : methyl urea (1 : 2) DES at varying quencher ( $\text{CH}_3\text{NO}_2$ ) concentration at 358 K. Errors associated with decay times are  $\leq \pm 2\%$ .

|                                           |                | $m_{\text{LiCl}}$       |        |        |        |        |        |        |     |
|-------------------------------------------|----------------|-------------------------|--------|--------|--------|--------|--------|--------|-----|
|                                           |                | (mol.kg <sup>-1</sup> ) | 0.0    | 0.5    | 1.0    | 1.5    | 2.0    | 2.5    | 3.0 |
| [CH <sub>3</sub> NO <sub>2</sub> ]<br>(M) |                |                         |        |        |        |        |        |        |     |
| <b>0.00</b>                               | $\tau_1$       | 1.87                    | 1.53   | 1.59   | 0.39   | 0.58   | 1.09   | 0.53   |     |
|                                           | ( $\alpha_1$ ) | (0.6)                   | (0.5)  | (0.8)  | (1.6)  | (1.2)  | (0.8)  | (1.3)  |     |
|                                           | $\tau_2$       | 142                     | 140    | 140    | 138    | 136    | 133    | 139    |     |
|                                           | ( $\alpha_2$ ) | (99.4)                  | (99.5) | (99.2) | (98.4) | (98.8) | (99.2) | (98.4) |     |
|                                           | $\chi^2$       | 0.99                    | 1.01   | 0.97   | 1.06   | 1.06   | 1.02   | 1.04   |     |
| <b>0.05</b>                               | $\tau_1$       | 1.88                    | 1.91   | 1.82   | 0.62   | 0.69   | 0.49   | 0.68   |     |
|                                           | ( $\alpha_1$ ) | (5.6)                   | (5.9)  | (5.3)  | (5.8)  | (3.5)  | (4.1)  | (3.6)  |     |
|                                           | $\tau_2$       | 17.9                    | 20.8   | 28.7   | 30.8   | 38.7   | 47.0   | 52.8   |     |
|                                           | ( $\alpha_2$ ) | (94.4)                  | (94.1) | (94.7) | (94.2) | (96.5) | (95.9) | (96.4) |     |
|                                           | $\chi^2$       | 1.10                    | 1.06   | 1.02   | 1.05   | 1.07   | 1.06   | 1.13   |     |
| <b>0.11</b>                               | $\tau_1$       | 1.66                    | 1.77   | 1.86   | 0.76   | 1.25   | 0.54   | 0.39   |     |
|                                           | ( $\alpha_1$ ) | (10.7)                  | (12.2) | (11.2) | (11.0) | (7.6)  | (6.7)  | (7.8)  |     |
|                                           | $\tau_2$       | 9.42                    | 11.1   | 15.0   | 15.3   | 22.1   | 29.5   | 36.4   |     |
|                                           | ( $\alpha_2$ ) | (89.3)                  | (87.8) | (88.8) | (89.0) | (92.4) | (93.3) | (92.2) |     |
|                                           | $\chi^2$       | 1.07                    | 1.09   | 1.08   | 1.07   | 1.17   | 1.19   | 1.19   |     |
| <b>0.16</b>                               | $\tau_1$       | 1.45                    | 1.52   | 1.50   | 0.71   | 0.78   | 0.27   | 0.11   |     |
|                                           | ( $\alpha_1$ ) | (16.6)                  | (18.5) | (15.3) | (14.3) | (12.4) | (13.5) | (24.9) |     |
|                                           | $\tau_2$       | 6.12                    | 7.57   | 9.47   | 11.2   | 15.3   | 18.9   | 24.3   |     |
|                                           | ( $\alpha_2$ ) | (83.4)                  | (81.5) | (84.7) | (85.7) | (87.6) | (86.5) | (75.1) |     |
|                                           | $\chi^2$       | 0.95                    | 1.01   | 1.05   | 1.06   | 1.03   | 1.10   | 1.05   |     |
| <b>0.21</b>                               | $\tau_1$       | 1.04                    | 1.10   | 1.18   | 0.53   | 0.69   | 0.15   | 0.08   |     |
|                                           | ( $\alpha_1$ ) | (19.5)                  | (21.8) | (19.2) | (19.4) | (14.1) | (28.3) | (40.5) |     |
|                                           | $\tau_2$       | 4.60                    | 5.63   | 6.99   | 7.75   | 11.2   | 14.9   | 18.4   |     |
|                                           | ( $\alpha_2$ ) | (80.5)                  | (78.2) | (80.8) | (80.6) | (85.9) | (71.7) | (59.5) |     |
|                                           | $\chi^2$       | 0.95                    | 1.02   | 1.08   | 1.08   | 1.04   | 0.98   | 1.06   |     |
| <b>0.27</b>                               | $\tau_1$       | 1.01                    | 0.87   | 0.88   | 0.45   | 0.69   | 0.08   | 0.05   |     |

|             |              |        |        |        |        |        |        |        |
|-------------|--------------|--------|--------|--------|--------|--------|--------|--------|
|             | $(\alpha_1)$ | (22.5) | (23.3) | (21.6) | (20.1) | (17.4) | (42.8) | (55.2) |
|             | $\tau_2$     | 3.58   | 4.39   | 5.63   | 6.13   | 9.48   | 10.8   | 15.0   |
|             | $(\alpha_2)$ | (77.5) | (76.7) | (78.4) | (79.9) | (82.6) | (57.2) | (44.8) |
|             | $\chi^2$     | 0.99   | 1.04   | 1.13   | 1.10   | 1.12   | 1.12   | 1.02   |
|             | $\tau_1$     | 0.92   | 0.71   | 0.69   | 0.35   | 0.62   | 0.06   | 0.04   |
| <b>0.32</b> | $(\alpha_1)$ | (25.6) | (25.8) | (23.2) | (22.1) | (19.8) | (45.2) | (60.2) |
|             | $\tau_2$     | 2.91   | 3.71   | 4.67   | 5.01   | 7.77   | 9.08   | 11.7   |
|             | $(\alpha_2)$ | (74.4) | (74.2) | (76.8) | (77.9) | (80.2) | (54.8) | (39.8) |
|             | $\chi^2$     | 0.98   | 1.05   | 1.10   | 1.07   | 1.10   | 1.05   | 1.13   |
|             | $\tau_1$     | 0.81   | 0.59   | 0.52   | 0.30   | 0.52   | 0.05   | 0.04   |
| <b>0.37</b> | $(\alpha_1)$ | (29.8) | (28.6) | (25.3) | (24.3) | (21.6) | (50.1) | (62.3) |
|             | $\tau_2$     | 2.46   | 3.21   | 4.03   | 4.20   | 6.23   | 7.88   | 9.93   |
|             | $(\alpha_2)$ | (70.2) | (71.4) | (74.7) | (75.7) | (78.4) | (49.9) | (37.7) |
|             | $\chi^2$     | 1.00   | 1.03   | 1.08   | 1.08   | 1.13   | 1.20   | 1.10   |

**Table S13:** Stern-Volmer dynamic quenching constant,  $K_D$  ( $M^{-1}$ ), obtained from the linear regression analysis of  $\tau_0/\tau$  vs  $[CH_3NO_2]$  data and estimated bimolecular quenching rate constant  $k_q$  ( $M^{-1}.s^{-1}$ ) for pyrene-nitromethane fluorophore-quencher pair in choline chloride : methyl urea (1 : 2) DES at different LiCl concentrations and 358 K.

| $m_{LiCl}$ ( $mol.kg^{-1}$ ) | $K_D$ ( $M^{-1}$ ) | $k_q$ ( $M^{-1}.s^{-1}$ ) $\times 10^8$ | $R^2$ |
|------------------------------|--------------------|-----------------------------------------|-------|
| 0.0                          | $146.9 \pm 2.5$    | $10.37 \pm 0.91$                        | 0.995 |
| 0.5                          | $113.7 \pm 2.3$    | $8.14 \pm 0.85$                         | 0.999 |
| 1.0                          | $89.9 \pm 1.7$     | $6.40 \pm 0.76$                         | 0.996 |
| 1.5                          | $82.1 \pm 1.3$     | $5.94 \pm 0.55$                         | 0.996 |
| 2.0                          | $52.8 \pm 0.5$     | $3.87 \pm 0.54$                         | 0.990 |
| 2.5                          | $41.4 \pm 0.4$     | $3.11 \pm 0.40$                         | 0.989 |
| 3.0                          | $30.3 \pm 0.4$     | $2.19 \pm 0.45$                         | 0.996 |



**Table S14:** Recovered excited-state intensity decay parameters for pyrene (10  $\mu\text{M}$ ; excitation with 340 nm Nano-LED; emission collected at 373 nm) dissolved in the LiCl-added choline chloride : phenol (1 : 2) DES at varying quencher ( $\text{CH}_3\text{NO}_2$ ) concentration at 358 K. Errors associated with decay times are  $\leq \pm 2\%$ .

|                                    |                | $m_{\text{LiCl}}$       |        |        |        |     |     |     |
|------------------------------------|----------------|-------------------------|--------|--------|--------|-----|-----|-----|
|                                    |                | (mol.kg <sup>-1</sup> ) |        |        |        |     |     |     |
| [CH <sub>3</sub> NO <sub>2</sub> ] |                | 0.0                     | 0.5    | 1.0    | 1.5    | 2.0 | 2.5 | 3.0 |
| (M)                                |                |                         |        |        |        |     |     |     |
| <b>0.00</b>                        | $\tau_1$       | 1.13                    | 44.5   | 44.8   | 1.14   |     |     |     |
|                                    | ( $\alpha_1$ ) | (0.4)                   | (0.3)  | (1.5)  | (0.9)  |     |     |     |
|                                    | $\tau_2$       | 94.0                    | 105    | 111    | 114    |     |     |     |
|                                    | ( $\alpha_2$ ) | (99.6)                  | (99.7) | (98.5) | (99.1) |     |     |     |
|                                    | $\chi^2$       | 1.00                    | 1.04   | 1.03   | 0.98   |     |     |     |
| <b>0.05</b>                        | $\tau_1$       | 1.01                    | 1.07   | 1.47   | 1.01   |     |     |     |
|                                    | ( $\alpha_1$ ) | (6.6)                   | (4.7)  | (7.1)  | (10.5) |     |     |     |
|                                    | $\tau_2$       | 7.42                    | 8.23   | 9.99   | 9.90   |     |     |     |
|                                    | ( $\alpha_2$ ) | (93.4)                  | (95.3) | (92.9) | (89.5) |     |     |     |
|                                    | $\chi^2$       | 1.02                    | 1.12   | 1.02   | 1.00   |     |     |     |
| <b>0.11</b>                        | $\tau_1$       | 0.87                    | 0.89   | 0.95   | 0.74   |     |     |     |
|                                    | ( $\alpha_1$ ) | (11.1)                  | (10.9) | (13.2) | (19.4) |     |     |     |
|                                    | $\tau_2$       | 3.64                    | 4.27   | 4.36   | 4.94   |     |     |     |
|                                    | ( $\alpha_2$ ) | (88.9)                  | (89.1) | (86.8) | (80.6) |     |     |     |
|                                    | $\chi^2$       | 0.87                    | 0.86   | 1.09   | 0.94   |     |     |     |
| <b>0.16</b>                        | $\tau_1$       | 0.55                    | 0.90   | 0.37   | 0.57   |     |     |     |
|                                    | ( $\alpha_1$ ) | (13.5)                  | (20.7) | (14.5) | (25.5) |     |     |     |
|                                    | $\tau_2$       | 2.44                    | 2.93   | 2.80   | 3.19   |     |     |     |
|                                    | ( $\alpha_2$ ) | (86.5)                  | (79.3) | (85.5) | (74.5) |     |     |     |
|                                    | $\chi^2$       | 0.94                    | 0.89   | 1.02   | 0.86   |     |     |     |
| <b>0.21</b>                        | $\tau_1$       | 0.54                    | 0.45   | 0.38   | 0.56   |     |     |     |
|                                    | ( $\alpha_1$ ) | (21.3)                  | (20.3) | (23.2) | (34.5) |     |     |     |
|                                    | $\tau_2$       | 1.83                    | 2.07   | 2.14   | 2.51   |     |     |     |
|                                    | ( $\alpha_2$ ) | (78.7)                  | (79.7) | (76.8) | (65.5) |     |     |     |
|                                    | $\chi^2$       | 1.02                    | 1.01   | 0.97   | 0.85   |     |     |     |
| <b>0.27</b>                        | $\tau_1$       | 0.49                    | 0.31   | 0.48   | 0.36   |     |     |     |

LiCl is not soluble

|             |              |        |        |        |        |
|-------------|--------------|--------|--------|--------|--------|
|             | $(\alpha_1)$ | (29.8) | (25.7) | (32.4) | (34.9) |
|             | $\tau_2$     | 1.51   | 1.62   | 1.72   | 1.87   |
|             | $(\alpha_2)$ | (70.2) | (74.3) | (67.6) | (65.1) |
|             | $\chi^2$     | 1.00   | 0.99   | 0.97   | 1.04   |
|             | $\tau_1$     | 0.42   | 0.25   | 0.42   | 0.25   |
| <b>0.32</b> | $(\alpha_1)$ | (32.8) | (29.7) | (40.1) | (37.8) |
|             | $\tau_2$     | 1.26   | 1.34   | 1.41   | 1.53   |
|             | $(\alpha_2)$ | (67.2) | (70.3) | (59.9) | (62.2) |
|             | $\chi^2$     | 1.01   | 1.02   | 1.00   | 1.01   |
|             | $\tau_1$     | 0.35   | 0.19   | 0.37   | 0.17   |
| <b>0.37</b> | $(\alpha_1)$ | (35.1) | (33.7) | (48.3) | (50.2) |
|             | $\tau_2$     | 1.07   | 1.14   | 1.19   | 1.27   |
|             | $(\alpha_2)$ | (64.9) | (66.3) | (51.7) | (49.8) |
|             | $\chi^2$     | 1.05   | 0.98   | 0.99   | 1.03   |

**Table S15:** Stern-Volmer dynamic quenching constant,  $K_D$  ( $M^{-1}$ ), obtained from the linear regression analysis of  $\tau_0/\tau$  vs  $[CH_3NO_2]$  data and estimated bimolecular quenching rate constant  $k_q$  ( $M^{-1}.s^{-1}$ ) for pyrene-nitromethane fluorophore-quencher pair in choline chloride : phenol (1 : 2) DES at different LiCl concentrations and 358 K.

| $m_{LiCl}$ ( $mol.kg^{-1}$ ) | $K_D$ ( $M^{-1}$ ) | $k_q$ ( $M^{-1}.s^{-1}$ ) $\times 10^8$ | $R^2$ |
|------------------------------|--------------------|-----------------------------------------|-------|
| 0.0                          | $232.4 \pm 4.1$    | $24.70 \pm 1.04$                        | 0.999 |
| 0.5                          | $239.3 \pm 4.3$    | $22.70 \pm 1.03$                        | 0.996 |
| 1.0                          | $241.8 \pm 5.2$    | $21.20 \pm 1.02$                        | 0.997 |
| 1.5                          | $227.8 \pm 4.5$    | $19.90 \pm 1.06$                        | 0.993 |

**Table S16:** Recovered anisotropy decay parameters for perylene (5  $\mu\text{M}$ ; excitation with 405 nm Nano-LED; emission collected at 445 nm) dissolved in the LiCl-added Glycine system at different temperatures and LiCl concentrations.

**$T$  (K) = 298**

| $m_{\text{LiCl}}$<br>(mol.kg <sup>-1</sup> ) | $r_0$                          | $\theta$ (ns)               | $\chi^2$ |
|----------------------------------------------|--------------------------------|-----------------------------|----------|
| <b>0.0</b>                                   | 0.287 $\pm$ 0.000 <sub>2</sub> | 5.17 $\pm$ 0.03             | 1.20     |
| <b>0.5</b>                                   | 0.298 $\pm$ 0.001 <sub>1</sub> | 7.51 $\pm$ 0.02             | 1.32     |
| <b>1.0</b>                                   | 0.311 $\pm$ 0.001 <sub>2</sub> | 9.67 $\pm$ 0.02             | 1.16     |
| <b>1.5</b>                                   | 0.315 $\pm$ 0.000 <sub>9</sub> | 13.0 $\pm$ 0.0 <sub>5</sub> | 1.16     |
| <b>2.0</b>                                   | 0.320 $\pm$ 0.001 <sub>1</sub> | 17.5 $\pm$ 0.0 <sub>4</sub> | 1.22     |
| <b>2.5</b>                                   | 0.326 $\pm$ 0.000 <sub>8</sub> | 26.6 $\pm$ 0.0 <sub>5</sub> | 1.13     |
| <b>3.0</b>                                   | 0.329 $\pm$ 0.001 <sub>3</sub> | 37.6 $\pm$ 0.0 <sub>4</sub> | 1.15     |

**$T$  (K) = 313**

| $m_{\text{LiCl}}$<br>(mol.kg <sup>-1</sup> ) | $r_0$                          | $\theta$ (ns)               | $\chi^2$ |
|----------------------------------------------|--------------------------------|-----------------------------|----------|
| <b>0.0</b>                                   | 0.269 $\pm$ 0.000 <sub>3</sub> | 2.48 $\pm$ 0.01             | 1.25     |
| <b>0.5</b>                                   | 0.274 $\pm$ 0.000 <sub>2</sub> | 3.38 $\pm$ 0.02             | 1.28     |
| <b>1.0</b>                                   | 0.284 $\pm$ 0.001 <sub>2</sub> | 4.67 $\pm$ 0.02             | 1.34     |
| <b>1.5</b>                                   | 0.289 $\pm$ 0.000 <sub>8</sub> | 6.56 $\pm$ 0.03             | 1.35     |
| <b>2.0</b>                                   | 0.294 $\pm$ 0.000 <sub>5</sub> | 8.78 $\pm$ 0.02             | 1.21     |
| <b>2.5</b>                                   | 0.307 $\pm$ 0.001 <sub>4</sub> | 11.8 $\pm$ 0.0 <sub>4</sub> | 1.20     |
| <b>3.0</b>                                   | 0.311 $\pm$ 0.001 <sub>1</sub> | 16.7 $\pm$ 0.0 <sub>3</sub> | 1.23     |

**$T$  (K) = 328**

| $m_{\text{LiCl}}$<br>(mol.kg <sup>-1</sup> ) | $r_0$                          | $\theta$ (ns)   | $\chi^2$ |
|----------------------------------------------|--------------------------------|-----------------|----------|
| <b>0.0</b>                                   | 0.245 $\pm$ 0.001 <sub>3</sub> | 1.39 $\pm$ 0.04 | 1.24     |
| <b>0.5</b>                                   | 0.252 $\pm$ 0.000 <sub>2</sub> | 1.82 $\pm$ 0.03 | 1.29     |
| <b>1.0</b>                                   | 0.253 $\pm$ 0.001 <sub>2</sub> | 2.56 $\pm$ 0.01 | 1.23     |
| <b>1.5</b>                                   | 0.266 $\pm$ 0.000 <sub>5</sub> | 3.19 $\pm$ 0.02 | 1.30     |

|            |                     |                 |      |
|------------|---------------------|-----------------|------|
| <b>2.0</b> | $0.273 \pm 0.000_7$ | $4.00 \pm 0.04$ | 1.39 |
| <b>2.5</b> | $0.286 \pm 0.000_4$ | $5.73 \pm 0.04$ | 1.31 |
| <b>3.0</b> | $0.287 \pm 0.000_2$ | $7.41 \pm 0.05$ | 1.22 |

---

**$T$  (K) = 343**

| $m_{LiCl}$<br>(mol.kg <sup>-1</sup> ) | $r_0$               | $\theta$ (ns)   | $\chi^2$ |
|---------------------------------------|---------------------|-----------------|----------|
| <b>0.0</b>                            | $0.237 \pm 0.001_1$ | $0.84 \pm 0.02$ | 1.15     |
| <b>0.5</b>                            | $0.241 \pm 0.001_2$ | $1.07 \pm 0.04$ | 1.21     |
| <b>1.0</b>                            | $0.229 \pm 0.000_8$ | $1.39 \pm 0.03$ | 1.22     |
| <b>1.5</b>                            | $0.243 \pm 0.001_3$ | $1.84 \pm 0.03$ | 1.34     |
| <b>2.0</b>                            | $0.246 \pm 0.000_9$ | $2.37 \pm 0.04$ | 1.33     |
| <b>2.5</b>                            | $0.269 \pm 0.001_5$ | $3.10 \pm 0.05$ | 1.33     |
| <b>3.0</b>                            | $0.269 \pm 0.000_3$ | $4.44 \pm 0.02$ | 1.46     |

---

**$T$  (K) = 358**

| $m_{LiCl}$<br>(mol.kg <sup>-1</sup> ) | $r_0$               | $\theta$ (ns)   | $\chi^2$ |
|---------------------------------------|---------------------|-----------------|----------|
| <b>0.0</b>                            | $0.195 \pm 0.001_2$ | $0.56 \pm 0.02$ | 1.12     |
| <b>0.5</b>                            | $0.215 \pm 0.001_0$ | $0.62 \pm 0.04$ | 1.11     |
| <b>1.0</b>                            | $0.222 \pm 0.000_8$ | $0.85 \pm 0.03$ | 1.09     |
| <b>1.5</b>                            | $0.236 \pm 0.001_1$ | $1.03 \pm 0.02$ | 1.14     |
| <b>2.0</b>                            | $0.238 \pm 0.000_7$ | $1.35 \pm 0.05$ | 1.21     |
| <b>2.5</b>                            | $0.230 \pm 0.000_5$ | $1.90 \pm 0.05$ | 1.20     |
| <b>3.0</b>                            | $0.247 \pm 0.001_5$ | $2.32 \pm 0.04$ | 1.27     |

---

**Table S17:** Linear regression analysis of  $\theta$  (ns) of perylene vs  $\eta/T$  data of LiCl-added Glyceline.

| $m_{LiCl}$ | <b>Slope <math>\times 10^{-9}</math><br/>(ns.K.mPa<sup>-1</sup>)</b> | <b>R<sup>2</sup></b> |
|------------|----------------------------------------------------------------------|----------------------|
| 0.0        | 4.18 $\pm$ 0.15                                                      | 0.956                |
| 0.5        | 3.41 $\pm$ 0.20                                                      | 0.968                |
| 1.0        | 2.40 $\pm$ 0.13                                                      | 0.924                |
| 1.5        | 1.75 $\pm$ 0.12                                                      | 0.896                |
| 2.0        | 2.15 $\pm$ 0.16                                                      | 0.934                |
| 2.5        | 1.71 $\pm$ 0.14                                                      | 0.895                |
| 3.0        | 1.97 $\pm$ 0.15                                                      | 0.735                |

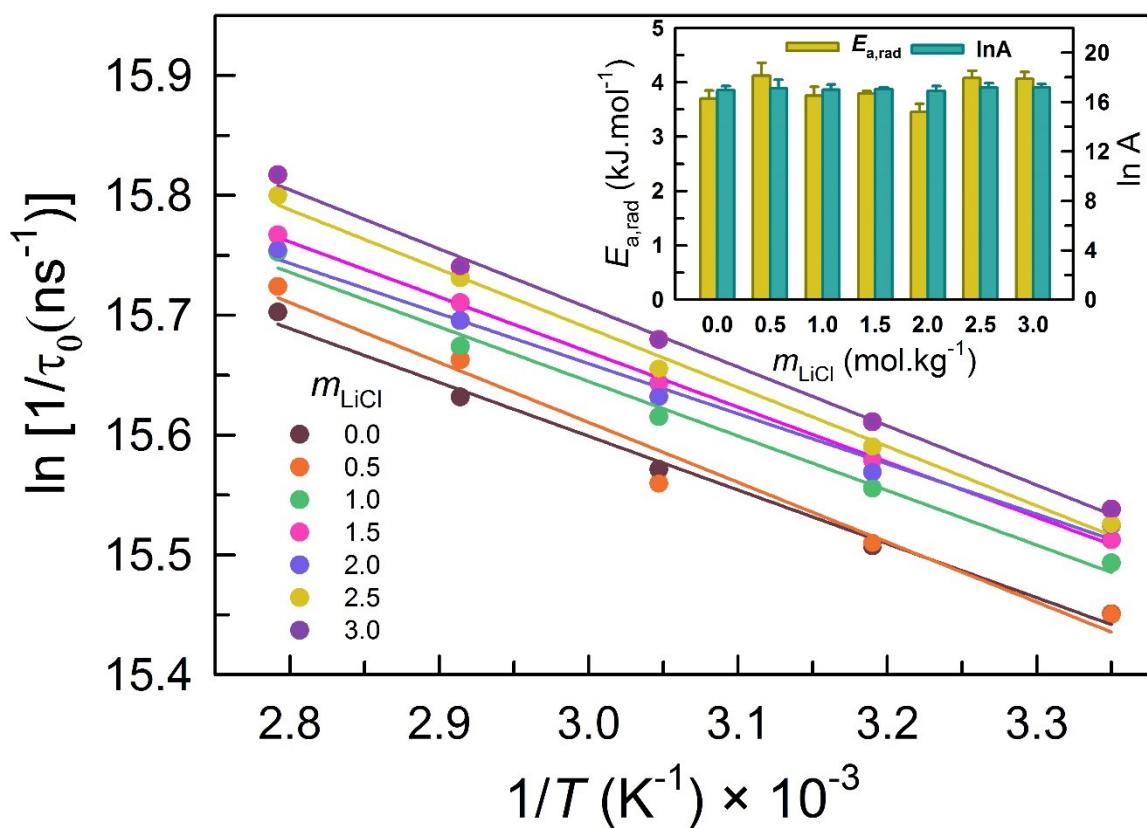

**Fig. S1:** Plot of  $\ln(1/\tau_0)$  vs  $1/T$  for pyrene in LiCl-added Glyceline with the inset showing corresponding activation energies for radiative transition ( $E_{a,rad}$ ) for different LiCl concentrations.
